# Supplementary material for: Interaction of cationic gemini surfactant tetramethylene-1,4-bis(dimethyltetradecylammonium bromide) with anionic polyelectrolyte sodium carboxymethyl cellulose, with two different molar masses, in aqueous and aquo-organic (isopropanol) media
Source: Royal Society of Chemistry journal article supplement (doi:10.1039/c6ra00640j), 2016-01-01
Supplement: c6ra00640j1.pdf [file c6ra00640j1.pdf]

## Supporting Information

Sibani Das, Satyajit Mondal, and Soumen Ghosh\*

Centre for Surface Science, Department of Chemistry, Jadavpur University, Kolkata - 700 032,  
India.

**Table S1. Interaction characteristics of 14-4-14 with NaCMC-2 in aqueous and aqueous-IP medium obtained from conductometry and tensiometry methods at 298K**

| %of IP | [NaCMC-2]/ g% | Conductometry |               | Surface Tension  |               |               | $\alpha_1$ | $\alpha_2$ | $-\Delta G_m^0$<br>kJ mol <sup>-1</sup> |
|--------|---------------|---------------|---------------|------------------|---------------|---------------|------------|------------|-----------------------------------------|
|        |               | $c_s$<br>(mM) | $c_f$<br>(mM) | $c_{ac}$<br>(mM) | $c_s$<br>(mM) | $c_f$<br>(mM) |            |            |                                         |
| 0      | 0.005         | 0.065         | 0.220         | 0.026            | 0.062         | 0.218         | 1.24       | 0.53       | 59.8                                    |
|        | 0.0075        | 0.092         | 0.262         | 0.027            | 0.063         | 0.255         | 1.24       | 0.58       | 55.9                                    |
|        | 0.01          | 0.101         | 0.284         | 0.043            | 0.110         | 0.277         | 1.25       | 0.60       | 54.3                                    |
| 5      | 0.005         | 0.069         | 0.269         | 0.030            | 0.066         | 0.266         | 1.28       | 0.57       | 56.2                                    |
|        | 0.0075        | 0.071         | 0.279         | 0.030            | 0.075         | 0.285         | 1.29       | 0.59       | 54.9                                    |
|        | 0.01          | 0.119         | 0.360         | 0.033            | 0.115         | 0.323         | 1.34       | 0.63       | 51.3                                    |
| 7      | 0.005         | 0.079         | 0.292         | 0.031            | 0.076         | 0.298         | 1.37       | 0.62       | 52.8                                    |
|        | 0.0075        | 0.116         | 0.324         | 0.040            | 0.095         | 0.317         | 1.40       | 0.65       | 50.6                                    |
|        | 0.01          | 0.123         | 0.360         | 0.046            | 0.096         | 0.350         | 1.44       | 0.68       | 48.3                                    |
| 10     | 0.005         | 0.082         | 0.320         | 0.036            | 0.088         | 0.314         | 1.38       | 0.63       | 51.7                                    |
|        | 0.0075        | 0.116         | 0.355         | 0.041            | 0.100         | 0.411         | 1.42       | 0.67       | 48.9                                    |
|        | 0.01          | 0.130         | 0.410         | 0.054            | 0.112         | 0.442         | 1.52       | 0.70       | 46.6                                    |

**Table S2. Various interfacial parameters ( $\Gamma_{\max}^{C_f}$ ,  $A_{\min}^{C_f}$ ,  $\Pi_{C_f}$  and  $\Delta G_{ad(C_f)}^0$ ) of 14-4-14 with**

**NaCMC-2 in aqueous and aqueous-IP medium at 298 K**

| % of IP | [NaCMC-2]/ g% | $10^6 \Gamma_{\max}^{C_f}$<br>mol m <sup>-2</sup> | $A_{\min}^{C_f}$<br>nm <sup>2</sup> molecule <sup>-1</sup> | $\Pi_{C_f}$<br>mN m <sup>-1</sup> | $-\Delta G_{ad(C_f)}^0$<br>kJ mol <sup>-1</sup> |
|---------|---------------|---------------------------------------------------|------------------------------------------------------------|-----------------------------------|-------------------------------------------------|
| 0       | 0.005         | 0.98                                              | 1.69                                                       | 37.4                              | 97.9                                            |
|         | 0.0075        | 0.96                                              | 1.73                                                       | 33.6                              | 90.9                                            |
|         | 0.01          | 0.94                                              | 1.77                                                       | 35.8                              | 92.4                                            |
| 5       | 0.005         | 0.96                                              | 1.73                                                       | 17.1                              | 74.0                                            |
|         | 0.0075        | 0.93                                              | 1.79                                                       | 17.6                              | 73.8                                            |
|         | 0.01          | 0.92                                              | 1.80                                                       | 16.8                              | 69.6                                            |
| 7       | 0.005         | 0.92                                              | 1.80                                                       | 13.9                              | 67.9                                            |
|         | 0.0075        | 0.90                                              | 1.84                                                       | 14.4                              | 64.1                                            |
|         | 0.01          | 0.89                                              | 1.87                                                       | 13.2                              | 63.1                                            |
| 10      | 0.005         | 0.90                                              | 1.84                                                       | 8.5                               | 61.1                                            |
|         | 0.0075        | 0.89                                              | 1.87                                                       | 8.8                               | 58.8                                            |
|         | 0.01          | 0.87                                              | 1.91                                                       | 9.5                               | 57.5                                            |

**Table S3. Hydrodynamic diameter ( $D_h$ ) and polydispersity index (PDI) for GS-NaCMC interacted complex in water and IP-water media at 298 K**

| % of IP | Hydrodynamic diameter ( $D_h$ ) / nm (PDI) |             |              |             |
|---------|--------------------------------------------|-------------|--------------|-------------|
|         | NaCMC-1                                    |             | NaCMC-2      |             |
|         | [GS] = 0                                   | [GS] = cac  | [GS] = 0     | [GS] = cac  |
| 0       | 349                                        | 141.3       | 561.9        | 92.9, 725.5 |
|         | (0.312)                                    | (0.614)     | (0.492)      | (0.500)     |
| 5       | 141.3                                      | 85.0, 599.5 | 101.4, 316.4 | 76.5, 515.4 |
|         | (0.338)                                    | (0.570)     | (0.584)      | (0.340)     |
| 7       | 108.7                                      | 82.8, 476.8 | 84.0         | 65.5, 360.2 |
|         | (0.343)                                    | (0.478)     | (0.277)      | (0.508)     |
| 10      | 104.9                                      | 80.3, 543.9 | 69.8         | 61.3, 306.8 |
|         | (0.303)                                    | (0.739)     | (0.362)      | (0.521)     |

The PDI values are in the parenthesis.

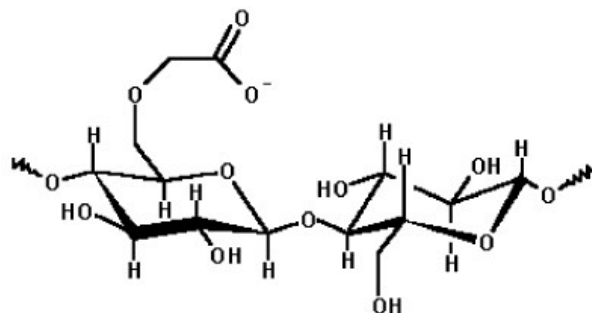

**Scheme 1.** Structure of Sodium Carboxymethyl cellulose

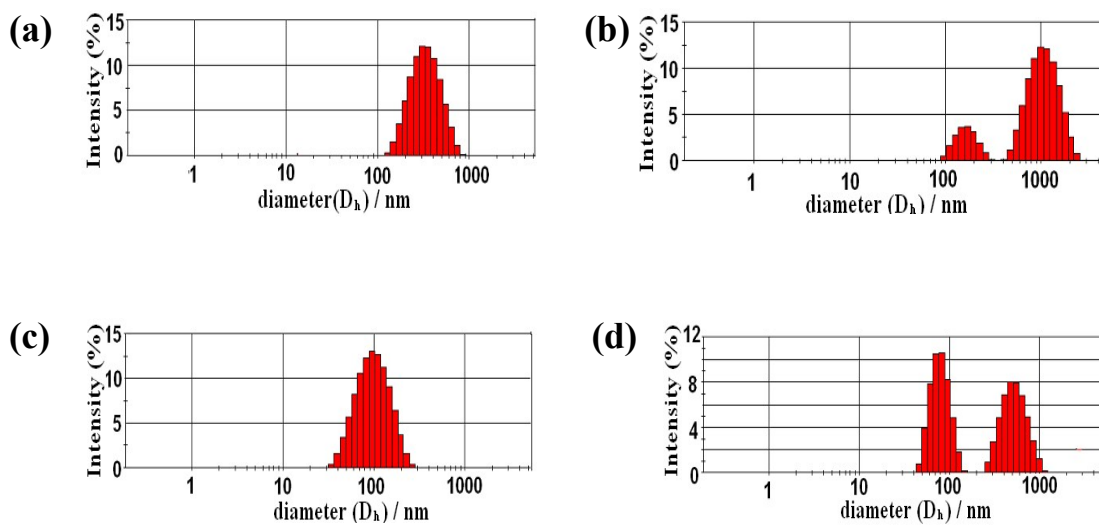

**Figure S1.** Particle size distribution of (a) NaCMC-1 in water, (b) 0.0075 g% NaCMC-GS interacted complex in water at cac, (c) NaCMC-1 in 10 % IP, (d) 0.0075 g% NaCMC-GS interacted complex in 10% IP at cac. In all cases, [NaCMC-1]=0.0075 g%.

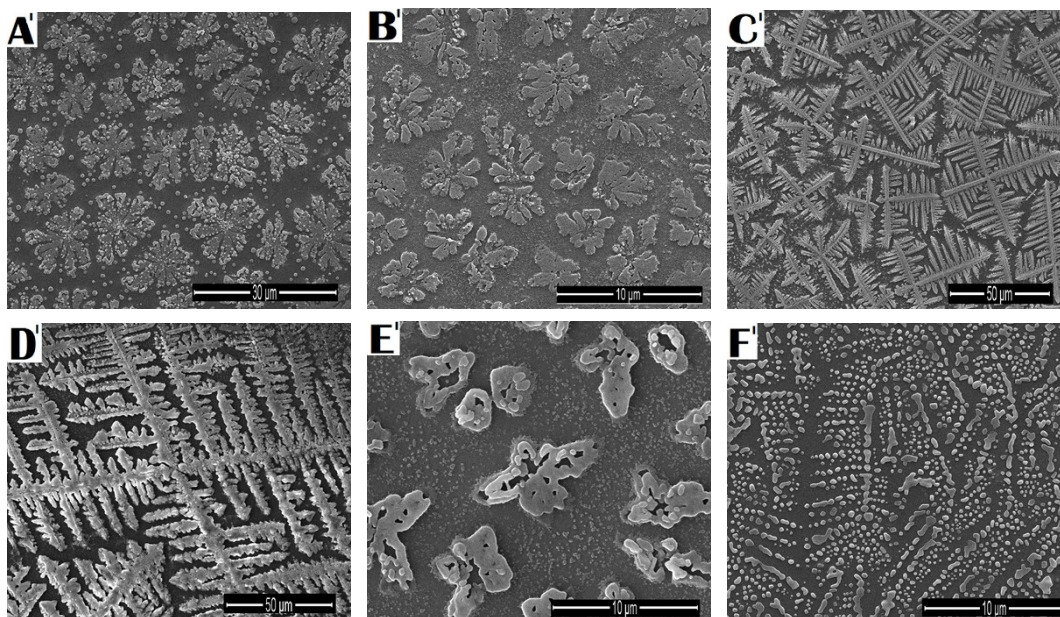

**Figure S2.** (A) Pure NaCMC-2 (0.0075 g %) in water; (B) interaction with 14-4-14 at cac; (C) at  $C_S$ ; (D) at  $C_f$ ; (E) Pure NaCMC-2 (0.0075 g %) in 10 % IP; (F) interaction with 14-4-14 in 10 % IP at  $C_f$ .
